# Supplementary material
Source: Research Square preprint supplement (doi:10.21203/rs.3.rs-10363849/v1)
Supplement: Supplementary file 1 [file 9b1b66c58598b4626ed6f525.docx]

**Supplementary Material for Review**

The supplementary materials associated with this manuscript include additional supporting information related to the study methodology and data analysis. These materials are provided to facilitate transparency, reproducibility, and detailed evaluation of the research findings.

Supplementary materials include:

1. Structured interview schedule/questionnaire used for data collection from horse owners.
2. Detailed statistical tables and chi-square analysis results.
3. Additional data on housing, feeding, breeding, healthcare, and behavioural management practices.
4. Photographic documentation of equine management systems under field conditions (if applicable).
5. Raw or summarized datasets supporting the reported findings (available upon reasonable request).

These supplementary files support the interpretation of the results and provide additional methodological details relevant to the assessment of equine management practices and welfare implications in South Gujarat, India.

We sincerely hope that the manuscript will be considered suitable for publication in your esteemed journal. Thank you for your time and consideration.

Sincerely,

Dr.D.C. Moliya

Department of Livestock Production Management, College of Veterinary Science & AH, Kamdhenu University, Rajpur (Nava), Himmatnagar-383010, Gujarat, India

Email: [drmoliya@kamdhenuuni.edu.in](mailto:drmoliya@kamdhenuuni.edu.in)
